# Supplementary material for: Considering the Influence of Nonadaptive Evolution on Primate Color Vision
Source: PLOS journal article supplement (doi:10.1371/journal.pone.0149664), 2016-03-09
Supplement: S2 (10.1371/journal.pone.0149664.s002) [file journal.pone.0149664.s002]

**S1 Table. Number of individual red-bellied lemurs for which fecal samples were collected in RNP.** Samples were collected between January 2011 and May 2013.

| <b>Site</b>     | <i>N</i> <sub>groups</sub> | <i>N</i> <sub>adult<br/>males</sub> | <i>N</i> <sub>adult<br/>females</sub> | <i>N</i> <sub>immature<br/>females</sub> | <i>N</i> <sub>immature<br/>males</sub> | <i>N</i> <sub>individuals</sub> |
|-----------------|----------------------------|-------------------------------------|---------------------------------------|------------------------------------------|----------------------------------------|---------------------------------|
| Ambatolahy dimy | 4                          | 4                                   | 3                                     | 1                                        | 1                                      | 9                               |
| Sahamalaotra    | 4                          | 3                                   | 4                                     | 2                                        | 2                                      | 11                              |
| Sakaroa         | 11                         | 9                                   | 10                                    | 4                                        | 3                                      | 26                              |
| Talatakely      | 11                         | 11                                  | 13                                    | 9                                        | 4                                      | 37                              |
| Valohoaka       | 10                         | 10                                  | 10                                    | 9                                        | 9                                      | 38                              |
| Vatoharanana    | 12                         | 12                                  | 12                                    | 5                                        | 7                                      | 36                              |
| <b>Total</b>    | <b>52</b>                  | <b>49</b>                           | <b>52</b>                             | <b>30</b>                                | <b>26</b>                              | <b>157</b>                      |
