# Supplementary material for: Considering the Influence of Nonadaptive Evolution on Primate Color Vision
Source: PLOS journal article supplement (doi:10.1371/journal.pone.0149664), 2016-03-09
Supplement: S6 (10.1371/journal.pone.0149664.s006) [file journal.pone.0149664.s006]

**S5 Table. Pairwise  $F_{st}$  values for each sample locality within RNP.**  $F_{st}$  values are above the diagonal and  $p$  values are below.  $p$  values that were below the Bonferroni-corrected significance value of 0.05 ( $p < 0.008$ ) are in bold.

|              | Sahamalaotra | Talatakely | Valohoaka    | Vatoharanana |
|--------------|--------------|------------|--------------|--------------|
| Sahamalaotra | ---          | 0.066      | 0.081        | 0.099        |
| Talatakely   | 0.009        | ---        | 0.022        | -0.008       |
| Valohoaka    | <b>0.002</b> | 0.053      | ---          | 0.047        |
| Vatoharanana | <b>0.001</b> | 0.813      | <b>0.003</b> | ---          |
